# Supplementary material for: RNA inverse folding using Monte Carlo tree search
Source: PubMed Central journal article supplement (PMC5674771; doi:10.1186/s12859-017-1882-7), 2017-11-06
Supplement: 12859_2017_1882_MOESM1_ESM.pdf [file 12859_2017_1882_MOESM1_ESM.pdf]

# RNA Inverse Folding using Monte Carlo Tree Search

## Supplementary report

Xiufeng Yang<sup>1</sup>, Kazuki Yoshizoe<sup>4</sup>, Akito Taneda<sup>2</sup>, Koji Tsuda<sup>1,3,4\*</sup>

<sup>1</sup> Department of Computational Biology and Medical Sciences, Graduate School of Frontier Sciences, The University of Tokyo, Japan.

<sup>2</sup> Graduate School of Science and Technology, Hirosaki University, Japan.

<sup>3</sup> Center for Materials Research by Information Integration, National Institute for Materials Science, Japan.

<sup>4</sup>RIKEN Center for Advanced Intelligence Project, Japan.

## Contents

|          |                                                                          |          |
|----------|--------------------------------------------------------------------------|----------|
| <b>1</b> | <b>Comparison results of MCTS-RNA and local search</b>                   | <b>2</b> |
| <b>2</b> | <b>Comparison results of MCTS-RNA, antaRNA and MODENA</b>                | <b>9</b> |
| 2.1      | Results of individual targets with different GC content values . . . . . | 9        |
| 2.2      | Results of MCTS-RNA and antaRNA with optimized parameters . . . . .      | 16       |
| 2.3      | Results without the structures used in parameter optimization . . . . .  | 19       |

# 1 Comparison results of MCTS-RNA and local search

Table S1 to Table S7 reports the number of successes and running time comparison of MCTS-RNA and local search with specific target GC content (0.2, 0.3, 0.4, 0.6, 0.7 0.8) on each Rfam structure.  $Sc$  represents the number of successes of 50 runs.  $E_t$  represents the average running time (in seconds) of successfully designed sequences of 50 runs.

Table S1: GC-content 0.2

| Data    |     |        | MCTS-RNA |        | Local search |        |
|---------|-----|--------|----------|--------|--------------|--------|
| Rfam    | len | $\ell$ | $Sc$     | $E_t$  | $Sc$         | $E_t$  |
| RF00001 | 117 | 83     | 0/50     | –      | 0/50         | –      |
| RF00002 | 151 | 127    | 0/50     | –      | 0/50         | –      |
| RF00003 | 16  | 121    | 0/50     | –      | 0/50         | –      |
| RF00004 | 193 | 149    | 50/50    | 45.36  | 50/50        | 41.19  |
| RF00005 | 74  | 53     | 50/50    | 0.85   | 50/50        | 33.02  |
| RF00006 | 89  | 69     | 48/50    | 109.1  | 45/50        | 153.31 |
| RF00007 | 154 | 112    | 13/50    | 276.7  | 25/50        | 229.68 |
| RF00008 | 54  | 39     | 50/50    | 0.58   | 50/50        | 11.51  |
| RF00009 | 348 | 293    | 0/50     | –      | 0/50         | –      |
| RF00010 | 357 | 255    | 0/50     | –      | 0/50         | –      |
| RF00011 | 382 | 382    | 0/50     | –      | 0/50         | –      |
| RF00012 | 215 | 176    | 47/50    | 166.96 | 8/50         | 212.92 |
| RF00013 | 185 | 137    | 47/50    | 156.23 | 24/50        | 265.88 |
| RF00014 | 87  | 58     | 50/50    | 0.45   | 50/50        | 7.27   |
| RF00015 | 140 | 109    | 5/50     | 504.4  | 1/50         | 52.57  |
| RF00016 | 129 | 129    | 0/50     | –      | 0/50         | –      |
| RF00017 | 301 | 200    | 2/50     | 123.05 | 0/50         | –      |
| RF00018 | 360 | 311    | 0/50     | –      | 0/50         | –      |
| RF00019 | 83  | 60     | 50/50    | 77     | 44/50        | 145.69 |
| RF00020 | 119 | 89     | 0/50     | –      | 0/50         | –      |
| RF00021 | 118 | 81     | 50/50    | 0.45   | 50/50        | 1.46   |
| RF00022 | 148 | 115    | 48/50    | 109.99 | 27/50        | 258.15 |
| RF00024 | 451 | 346    | 0/50     | –      | 0/50         | –      |
| RF00025 | 210 | 173    | 2/50     | 376.98 | 5/50         | 340.23 |
| RF00026 | 102 | 97     | 50/50    | 5.8    | 50/50        | 7.32   |
| RF00027 | 79  | 48     | 50/50    | 2.07   | 50/50        | 104.88 |
| RF00028 | 344 | 291    | 0/50     | –      | 0/50         | –      |
| RF00029 | 73  | 54     | 31/50    | 263.03 | 12/50        | 255.57 |
| RF00030 | 340 | 276    | 0/50     | –      | 0/50         | –      |
| Total   |     |        | 643/1450 |        | 541/1450     |        |

Table S2: GC-content 0.3

| Data    |     |        |          | MCTS-RNA |          | Local search |  |
|---------|-----|--------|----------|----------|----------|--------------|--|
| Rfam    | len | $\ell$ | $Sc$     | $E_t$    | $Sc$     | $E_t$        |  |
| RF00001 | 117 | 83     | 0/50     | –        | 0/50     | –            |  |
| RF00002 | 151 | 127    | 29/50    | 205.15   | 7/50     | 333.42       |  |
| RF00003 | 16  | 121    | 0/50     | –        | 0/50     | –            |  |
| RF00004 | 193 | 149    | 50/50    | 16.4     | 48/50    | 145.26       |  |
| RF00005 | 74  | 53     | 50/50    | 1.46     | 50/50    | 6.25         |  |
| RF00006 | 89  | 69     | 50/50    | 6.93     | 45/50    | 128.81       |  |
| RF00007 | 154 | 112    | 46/50    | 155.91   | 30/50    | 235.55       |  |
| RF00008 | 54  | 39     | 50/50    | 1.16     | 50/50    | 12.39        |  |
| RF00009 | 348 | 293    | 1/50     | 400.92   | 1/50     | 255.56       |  |
| RF00010 | 357 | 255    | 0/50     | –        | 0/50     | –            |  |
| RF00011 | 382 | 382    | 0/50     | –        | 0/50     | –            |  |
| RF00012 | 215 | 176    | 50/50    | 88.64    | 50/50    | 84.54        |  |
| RF00013 | 185 | 137    | 50/50    | 66.58    | 34/50    | 290.26       |  |
| RF00014 | 87  | 58     | 50/50    | 7.03     | 50/50    | 9.19         |  |
| RF00015 | 140 | 109    | 46/50    | 108.15   | 28/50    | 216.14       |  |
| RF00016 | 129 | 129    | 0/50     | –        | 0/50     | –            |  |
| RF00017 | 301 | 200    | 5/50     | 295.48   | 5/50     | 216.14       |  |
| RF00018 | 360 | 311    | 0/50     | –        | 0/50     | –            |  |
| RF00019 | 83  | 60     | 50/50    | 9.89     | 50/50    | 92.02        |  |
| RF00020 | 119 | 89     | 0/50     | –        | 0/50     | –            |  |
| RF00021 | 118 | 81     | 50/50    | 0.51     | 50/50    | 6.12         |  |
| RF00022 | 148 | 115    | 50/50    | 27.97    | 19/50    | 260.44       |  |
| RF00024 | 451 | 346    | 0/50     | –        | 0/50     | –            |  |
| RF00025 | 210 | 173    | 41/50    | 212.65   | 3/50     | 244.36       |  |
| RF00026 | 102 | 97     | 50/50    | 1.38     | 50/50    | 0.86         |  |
| RF00027 | 79  | 48     | 50/50    | 0.81     | 50/50    | 51.42        |  |
| RF00028 | 344 | 291    | 1/50     | 141.66   | 0/50     | –            |  |
| RF00029 | 73  | 54     | 50/50    | 73.09    | 14/50    | 272.57       |  |
| RF00030 | 340 | 276    | 7/50     | 248.83   | 5/50     | 286.79       |  |
| Total   |     |        | 826/1450 |          | 639/1450 |              |  |

Table S3: GC-content 0.4

| Data    |     |        | MCTS-RNA |        | Local search |        |
|---------|-----|--------|----------|--------|--------------|--------|
| Rfam    | len | $\ell$ | $Sc$     | $E_t$  | $Sc$         | $E_t$  |
| RF00001 | 117 | 83     | 7/50     | 123.27 | 2/50         | 294.03 |
| RF00002 | 151 | 127    | 50/50    | 14.19  | 50/50        | 10.7   |
| RF00003 | 16  | 121    | 0/50     | –      | 1/50         | 177.09 |
| RF00004 | 193 | 149    | 50/50    | 12.43  | 47/50        | 156.01 |
| RF00005 | 74  | 53     | 50/50    | 0.4    | 50/50        | 0.69   |
| RF00006 | 89  | 69     | 50/50    | 1.27   | 50/50        | 61.02  |
| RF00007 | 154 | 112    | 50/50    | 15.27  | 46/50        | 219.41 |
| RF00008 | 54  | 39     | 50/50    | 0.16   | 50/50        | 6.05   |
| RF00009 | 348 | 293    | 49/50    | 168.69 | 46/50        | 122.49 |
| RF00010 | 357 | 255    | 0/50     | –      | 0/50         | –      |
| RF00011 | 382 | 382    | 0/50     | –      | 0/50         | –      |
| RF00012 | 215 | 176    | 50/50    | 45.02  | 50/50        | 49.79  |
| RF00013 | 185 | 137    | 50/50    | 72.95  | 10/50        | 164.29 |
| RF00014 | 87  | 58     | 50/50    | 0.19   | 50/50        | 3.6    |
| RF00015 | 140 | 109    | 50/50    | 12.31  | 44/50        | 190.17 |
| RF00016 | 129 | 129    | 0/50     | –      | 0/50         | –      |
| RF00017 | 301 | 200    | 29/50    | 237.53 | 35/50        | 253.78 |
| RF00018 | 360 | 311    | 0/50     | –      | 0/50         | –      |
| RF00019 | 83  | 60     | 50/50    | 2.57   | 50/50        | 24.93  |
| RF00020 | 119 | 89     | 0/50     | –      | 0/50         | –      |
| RF00021 | 118 | 81     | 50/50    | 0.38   | 50/50        | 9.42   |
| RF00022 | 148 | 115    | 50/50    | 7.19   | 44/50        | 67.71  |
| RF00024 | 451 | 346    | 0/50     | –      | 0/50         | –      |
| RF00025 | 210 | 173    | 50/50    | 43.2   | 50/50        | 36.84  |
| RF00026 | 102 | 97     | 50/50    | 0.86   | 50/50        | 1.49   |
| RF00027 | 79  | 48     | 50/50    | 0.36   | 50/50        | 28.19  |
| RF00028 | 344 | 291    | 14/50    | 285.11 | 17/50        | 220.56 |
| RF00029 | 73  | 54     | 50/50    | 48.83  | 9/50         | 317.17 |
| RF00030 | 340 | 276    | 32/50    | 226.45 | 46/50        | 238.95 |
| Total   |     |        | 982/1450 |        | 897/1450     |        |

Table S4: GC content 0.5

| Data    |     |        | MCTS-RNA  |        | Local search |        |
|---------|-----|--------|-----------|--------|--------------|--------|
| Rfam    | $N$ | $\ell$ | $S_c$     | $E_t$  | $S_c$        | $E_t$  |
| RF00001 | 117 | 83     | 44/50     | 196.87 | 29/50        | 208.38 |
| RF00002 | 151 | 127    | 41/50     | 166.06 | 49/50        | 181.38 |
| RF00003 | 161 | 121    | 5/50      | 371.86 | 7/50         | 332.26 |
| RF00004 | 193 | 149    | 50/50     | 3.4    | 50/50        | 3.44   |
| RF00005 | 74  | 53     | 50/50     | 0.15   | 50/50        | 0.08   |
| RF00006 | 89  | 69     | 50/50     | 0.38   | 50/50        | 0.19   |
| RF00007 | 154 | 112    | 50/50     | 10.08  | 50/50        | 142.08 |
| RF00008 | 54  | 39     | 50/50     | 0.49   | 45/50        | 1.33   |
| RF00009 | 348 | 293    | 48/50     | 84.58  | 30/50        | 78.19  |
| RF00010 | 357 | 255    | 0/50      | –      | 0/50         | –      |
| RF00011 | 382 | 286    | 0/50      | –      | 0/50         | –      |
| RF00012 | 215 | 176    | 50/50     | 5.64   | 50/50        | 5.39   |
| RF00013 | 185 | 137    | 50/50     | 31.05  | 50/50        | 59.93  |
| RF00014 | 87  | 58     | 50/50     | 0.1    | 50/50        | 0.98   |
| RF00015 | 140 | 109    | 50/50     | 2.07   | 50/50        | 2.59   |
| RF00016 | 129 | 112    | 0/50      | –      | 0/50         | –      |
| RF00017 | 301 | 200    | 49/50     | 133.19 | 20/50        | 192.02 |
| RF00018 | 360 | 311    | 0/50      | –      | 0/50         | –      |
| RF00019 | 83  | 60     | 50/50     | 1.51   | 50/50        | 20.02  |
| RF00020 | 119 | 89     | 0/50      | –      | 0/50         | –      |
| RF00021 | 118 | 81     | 50/50     | 0.26   | 50/50        | 5.8    |
| RF00022 | 148 | 115    | 50/50     | 1.34   | 50/50        | 1.73   |
| RF00024 | 451 | 346    | 0/50      | –      | 0/50         | –      |
| RF00025 | 210 | 173    | 50/50     | 4.88   | 50/50        | 4.06   |
| RF00026 | 102 | 97     | 50/50     | 1.6    | 50/50        | 2.06   |
| RF00027 | 79  | 48     | 50/50     | 0.19   | 50/50        | 11.47  |
| RF00028 | 344 | 291    | 7/50      | 336.39 | 15/50        | 225.89 |
| RF00029 | 73  | 54     | 50/50     | 2.16   | 34/50        | 230.82 |
| RF00030 | 340 | 276    | 50/50     | 19.96  | 50/50        | 16.58  |
| total   |     |        | 1045/1450 |        | 979/1450     |        |

Table S5: GC-content 0.6

| Data    |     | MCTS-RNA |          |        | Local search |        |
|---------|-----|----------|----------|--------|--------------|--------|
| Rfam    | len | $\ell$   | $Sc$     | $E_t$  | $Sc$         | $E_t$  |
| RF00001 | 117 | 83       | 50/50    | 19.56  | 50/50        | 9.53   |
| RF00002 | 151 | 127      | 0/50     | –      | 2/50         | 305.68 |
| RF00003 | 16  | 121      | 26/50    | 213.4  | 29/50        | 250.79 |
| RF00004 | 193 | 149      | 50/50    | 2.31   | 50/50        | 2.43   |
| RF00005 | 74  | 53       | 50/50    | 0.08   | 50/50        | 0.02   |
| RF00006 | 89  | 69       | 50/50    | 0.47   | 50/50        | 0.58   |
| RF00007 | 154 | 112      | 50/50    | 4.11   | 50/50        | 8.24   |
| RF00008 | 54  | 39       | 50/50    | 0.27   | 50/50        | 0.3    |
| RF00009 | 348 | 293      | 4/50     | 232.75 | 4/50         | 313.79 |
| RF00010 | 357 | 255      | 0/50     | –      | 0/50         | –      |
| RF00011 | 382 | 382      | 0/50     | –      | 0/50         | –      |
| RF00012 | 215 | 176      | 50/50    | 26.39  | 50/50        | 25.7   |
| RF00013 | 185 | 137      | 50/50    | 3.56   | 50/50        | 4.42   |
| RF00014 | 87  | 58       | 50/50    | 0.13   | 50/50        | 2.86   |
| RF00015 | 140 | 109      | 50/50    | 2.77   | 50/50        | 2.66   |
| RF00016 | 129 | 129      | 0/50     | –      | 0/50         | –      |
| RF00017 | 301 | 200      | 48/50    | 70.17  | 30/50        | 94.1   |
| RF00018 | 360 | 311      | 0/50     | –      | 0/50         | –      |
| RF00019 | 83  | 60       | 50/50    | 0.39   | 50/50        | 1.03   |
| RF00020 | 119 | 89       | 0/50     | –      | 0/50         | –      |
| RF00021 | 118 | 81       | 50/50    | 0.5    | 50/50        | 6.1    |
| RF00022 | 148 | 115      | 50/50    | 1.86   | 50/50        | 2.43   |
| RF00024 | 451 | 346      | 0/50     | –      | 0/50         | –      |
| RF00025 | 210 | 173      | 50/50    | 50.25  | 50/50        | 39.54  |
| RF00026 | 102 | 97       | 50/50    | 4.51   | 50/50        | 5.65   |
| RF00027 | 79  | 48       | 50/50    | 0.19   | 50/50        | 7.14   |
| RF00028 | 344 | 291      | 1/50     | 477.45 | 0/50         | –      |
| RF00029 | 73  | 54       | 50/50    | 1.23   | 50/50        | 0.93   |
| RF00030 | 340 | 276      | 37/50    | 147.8  | 28/50        | 180.03 |
| Total   |     |          | 965/1450 |        | 943/1450     |        |

Table S6: GC-content 0.7

| Data    |     |        | MCTS-RNA |        | Local search |        |
|---------|-----|--------|----------|--------|--------------|--------|
| Rfam    | len | $\ell$ | $Sc$     | $E_t$  | $Sc$         | $E_t$  |
| RF00001 | 117 | 83     | 50/50    | 57.59  | 40/50        | 15.01  |
| RF00002 | 151 | 127    | 0/50     | –      | 0/50         | –      |
| RF00003 | 16  | 121    | 2/50     | 88.78  | 2/50         | 390.86 |
| RF00004 | 193 | 149    | 50/50    | 33.89  | 50/50        | 29.45  |
| RF00005 | 74  | 53     | 50/50    | 0.18   | 50/50        | 0.09   |
| RF00006 | 89  | 69     | 50/50    | 11.53  | 50/50        | 7.82   |
| RF00007 | 154 | 112    | 50/50    | 7.86   | 50/50        | 7.22   |
| RF00008 | 54  | 39     | 50/50    | 0.1    | 50/50        | 0.08   |
| RF00009 | 348 | 293    | 0/50     | –      | 0/50         | –      |
| RF00010 | 357 | 255    | 0/50     | –      | 0/50         | –      |
| RF00011 | 382 | 382    | 0/50     | –      | 0/50         | –      |
| RF00012 | 215 | 176    | 35/50    | 284.5  | 22/50        | 221.2  |
| RF00013 | 185 | 137    | 50/50    | 3.13   | 50/50        | 4.43   |
| RF00014 | 87  | 58     | 50/50    | 0.11   | 50/50        | 0.03   |
| RF00015 | 140 | 109    | 45/50    | 143.12 | 30/50        | 112.48 |
| RF00016 | 129 | 129    | 0/50     | –      | 0/50         | –      |
| RF00017 | 301 | 200    | 50/50    | 17     | 50/50        | 8.78   |
| RF00018 | 360 | 311    | 0/50     | –      | 0/50         | –      |
| RF00019 | 83  | 60     | 50/50    | 0.41   | 50/50        | 0.62   |
| RF00020 | 119 | 89     | 0/50     | –      | 0/50         | –      |
| RF00021 | 118 | 81     | 50/50    | 0.17   | 50/50        | 0.09   |
| RF00022 | 148 | 115    | 50/50    | 47.97  | 50/50        | 35     |
| RF00024 | 451 | 346    | 0/50     | –      | 0/50         | –      |
| RF00025 | 210 | 173    | 3/50     | 241.36 | 10/50        | 292.16 |
| RF00026 | 102 | 97     | 50/50    | 24.74  | 50/50        | 18.67  |
| RF00027 | 79  | 48     | 50/50    | 0.25   | 50/50        | 2.77   |
| RF00028 | 344 | 291    | 0/50     | –      | 0/50         | –      |
| RF00029 | 73  | 54     | 50/50    | 2.67   | 50/50        | 3.08   |
| RF00030 | 340 | 276    | 0/50     | –      | 0/50         | –      |
| Total   |     |        | 835/1450 |        | 804/1450     |        |

Table S7: GC-content 0.8

| Data    |     |        |          | MCTS-RNA |          | Local search |  |
|---------|-----|--------|----------|----------|----------|--------------|--|
| Rfam    | len | $\ell$ | $Sc$     | $E_t$    | $Sc$     | $E_t$        |  |
| RF00001 | 117 | 83     | 0/50     | –        | 0/50     | –            |  |
| RF00002 | 151 | 127    | 0/50     | –        | 0/50     | –            |  |
| RF00003 | 16  | 121    | 0/50     | –        | 0/50     | –            |  |
| RF00004 | 193 | 149    | 18/50    | 265.02   | 29/50    | 207.78       |  |
| RF00005 | 74  | 53     | 50/50    | 1.47     | 50/50    | 0.75         |  |
| RF00006 | 89  | 69     | 34/50    | 254.58   | 44/50    | 225.87       |  |
| RF00007 | 154 | 112    | 23/50    | 205.08   | 37/50    | 203.95       |  |
| RF00008 | 54  | 39     | 50/50    | 0.24     | 50/50    | 0.25         |  |
| RF00009 | 348 | 293    | 0/50     | –        | 0/50     | –            |  |
| RF00010 | 357 | 255    | 0/50     | –        | 0/50     | –            |  |
| RF00011 | 382 | 382    | 0/50     | –        | 0/50     | –            |  |
| RF00012 | 215 | 176    | 2/50     | 121.2    | 4/50     | 258.62       |  |
| RF00013 | 185 | 137    | 44/50    | 174.58   | 48/50    | 170.27       |  |
| RF00014 | 87  | 58     | 50/50    | 0.11     | 50/50    | 0.06         |  |
| RF00015 | 140 | 109    | 2/50     | 121.89   | 1/50     | 61.33        |  |
| RF00016 | 129 | 129    | 0/50     | –        | 0/50     | –            |  |
| RF00017 | 301 | 200    | 50/50    | 31.49    | 50/50    | 27.33        |  |
| RF00018 | 360 | 311    | 0/50     | –        | 0/50     | –            |  |
| RF00019 | 83  | 60     | 50/50    | 3.54     | 50/50    | 3.26         |  |
| RF00020 | 119 | 89     | 0/50     | –        | 0/50     | –            |  |
| RF00021 | 118 | 81     | 50/50    | 0.97     | 50/50    | 0.88         |  |
| RF00022 | 148 | 115    | 28/50    | 283.21   | 40/50    | 268.01       |  |
| RF00024 | 451 | 346    | 0/50     | –        | 0/50     | –            |  |
| RF00025 | 210 | 173    | 3/50     | 20.33    | 0/50     | –            |  |
| RF00026 | 102 | 97     | 50/50    | 149.79   | 48/50    | 145.37       |  |
| RF00027 | 79  | 48     | 50/50    | 0.23     | 50/50    | 3.73         |  |
| RF00028 | 344 | 291    | 0/50     | –        | 0/50     | –            |  |
| RF00029 | 73  | 54     | 49/50    | 99.3     | 50/50    | 24.34        |  |
| RF00030 | 340 | 276    | 0/50     | –        | 0/50     | –            |  |
| Total   |     |        | 603/1450 |          | 650/1450 |              |  |



## 2 Comparison results of MCTS-RNA, antaRNA and MODENA

### 2.1 Results of individual targets with different GC content values

Table S8 to Table S14 reports the number of successes and running time comparison of MCTS-RNA, antaRNA and MODENA with specific target GC content (0.2, 0.3, 0.4, 0.6, 0.7 0.8) on each Rfam structure.

Table S8: GC-content 0.2

| Data    |     |        |          | MCTS-RNA |          | antaRNA |          | MODENA |  |
|---------|-----|--------|----------|----------|----------|---------|----------|--------|--|
| Rfam    | len | $\ell$ | $Sc$     | $E_t$    | $Sc$     | $E_t$   | $Sc$     | $E_t$  |  |
| RF00001 | 117 | 83     | 0/50     | –        | 0/50     | –       | 0/50     | –      |  |
| RF00002 | 151 | 127    | 0/50     | –        | 0/50     | –       | 0/50     | –      |  |
| RF00003 | 16  | 121    | 0/50     | –        | 0/50     | –       | 0/50     | –      |  |
| RF00004 | 193 | 149    | 50/50    | 45.36    | 50/50    | 32.86   | 0/50     | –      |  |
| RF00005 | 74  | 53     | 50/50    | 0.85     | 50/50    | 1.79    | 18/50    | 34.21  |  |
| RF00006 | 89  | 69     | 48/50    | 109.1    | 50/50    | 10.38   | 1/50     | 39.1   |  |
| RF00007 | 154 | 112    | 13/50    | 276.7    | 6/50     | 25.46   | 3/50     | 79.86  |  |
| RF00008 | 54  | 39     | 50/50    | 0.58     | 50/50    | 0.84    | 17/50    | 29.4   |  |
| RF00009 | 348 | 293    | 0/50     | –        | 0/50     | –       | 0/50     | –      |  |
| RF00010 | 357 | 255    | 0/50     | –        | 0/50     | –       | 0/50     | –      |  |
| RF00011 | 382 | 382    | 0/50     | –        | 0/50     | –       | 0/50     | –      |  |
| RF00012 | 215 | 176    | 47/50    | 166.96   | 50/50    | 48.76   | 9/50     | 194.67 |  |
| RF00013 | 185 | 137    | 47/50    | 156.23   | 42/50    | 15.67   | 22/50    | 137.46 |  |
| RF00014 | 87  | 58     | 50/50    | 0.45     | 43/50    | 0.9     | 18/50    | 39.78  |  |
| RF00015 | 140 | 109    | 5/50     | 504.4    | 6/50     | 128.08  | 0/50     | –      |  |
| RF00016 | 129 | 129    | 0/50     | –        | 0/50     | –       | 0/50     | –      |  |
| RF00017 | 301 | 200    | 2/50     | 123.05   | 39/50    | 164.6   | 0/50     | –      |  |
| RF00018 | 360 | 311    | 0/50     | –        | 0/50     | –       | 0/50     | –      |  |
| RF00019 | 83  | 60     | 50/50    | 77       | 43/50    | 3.68    | 15/50    | 38.38  |  |
| RF00020 | 119 | 89     | 0/50     | –        | 0/50     | –       | 0/50     | –      |  |
| RF00021 | 118 | 81     | 50/50    | 0.45     | 50/50    | 1.88    | 22/50    | 56.34  |  |
| RF00022 | 148 | 115    | 48/50    | 109.99   | 41/50    | 17.6    | 8/50     | 74.4   |  |
| RF00024 | 451 | 346    | 0/50     | –        | 0/50     | –       | 0/50     | –      |  |
| RF00025 | 210 | 173    | 2/50     | 376.98   | 4/50     | 212.79  | 0/50     | –      |  |
| RF00026 | 102 | 97     | 50/50    | 5.8      | 42/50    | 4.34    | 13/50    | 39.75  |  |
| RF00027 | 79  | 48     | 50/50    | 2.07     | 50/50    | 1.34    | 15/50    | 36.49  |  |
| RF00028 | 344 | 291    | 0/50     | –        | 0/50     | –       | 0/50     | –      |  |
| RF00029 | 73  | 54     | 31/50    | 263.03   | 0/50     | –       | 9/50     | 35.78  |  |
| RF00030 | 340 | 276    | 0/50     | –        | 0/50     | –       | 0/50     | –      |  |
| Total   |     |        | 643/1450 |          | 616/1450 |         | 170/1450 |        |  |

Table S9: GC-content 0.3

| Data    |     |        |          | MCTS-RNA |          | antaRNA |          | MODENA |  |
|---------|-----|--------|----------|----------|----------|---------|----------|--------|--|
| Rfam    | len | $\ell$ | $Sc$     | $E_t$    | $Sc$     | $E_t$   | $Sc$     | $E_t$  |  |
| RF00001 | 117 | 83     | 0/50     | –        | 0/50     | –       | 0/50     | –      |  |
| RF00002 | 151 | 127    | 29/50    | 205.15   | 1/50     | 27.52   | 0/50     | –      |  |
| RF00003 | 16  | 121    | 0/50     | –        | 0/50     | –       | 0/50     | –      |  |
| RF00004 | 193 | 149    | 50/50    | 16.4     | 50/50    | 15.43   | 23/50    | 129.2  |  |
| RF00005 | 74  | 53     | 50/50    | 1.46     | 50/50    | 0.88    | 22/50    | 32.58  |  |
| RF00006 | 89  | 69     | 50/50    | 6.93     | 50/50    | 3.18    | 15/50    | 38.65  |  |
| RF00007 | 154 | 112    | 46/50    | 155.91   | 9/50     | 9.39    | 19/50    | 77.47  |  |
| RF00008 | 54  | 39     | 50/50    | 1.16     | 50/50    | 0.4     | 15/50    | 28.24  |  |
| RF00009 | 348 | 293    | 1/50     | 400.92   | 0/50     | –       | 0/50     | –      |  |
| RF00010 | 357 | 255    | 0/50     | –        | 0/50     | –       | 0/50     | –      |  |
| RF00011 | 382 | 382    | 0/50     | –        | 0/50     | –       | 0/50     | –      |  |
| RF00012 | 215 | 176    | 50/50    | 88.64    | 50/50    | 27.65   | 50/50    | 184.23 |  |
| RF00013 | 185 | 137    | 50/50    | 66.58    | 42/50    | 9.71    | 32/50    | 123.79 |  |
| RF00014 | 87  | 58     | 50/50    | 7.03     | 43/50    | 0.65    | 28/50    | 39.7   |  |
| RF00015 | 140 | 109    | 46/50    | 108.15   | 18/50    | 19.5    | 0/50     | –      |  |
| RF00016 | 129 | 129    | 0/50     | –        | 0/50     | –       | 0/50     | –      |  |
| RF00017 | 301 | 200    | 5/50     | 295.48   | 35/50    | 68.06   | 10/50    | 465.66 |  |
| RF00018 | 360 | 311    | 0/50     | –        | 0/50     | –       | 0/50     | –      |  |
| RF00019 | 83  | 60     | 50/50    | 9.89     | 42/50    | 2.3     | 25/50    | 37.6   |  |
| RF00020 | 119 | 89     | 0/50     | –        | 0/50     | –       | 0/50     | –      |  |
| RF00021 | 118 | 81     | 50/50    | 0.51     | 50/50    | 1.02    | 37/50    | 54.37  |  |
| RF00022 | 148 | 115    | 50/50    | 27.97    | 40/50    | 11.98   | 39/50    | 71.78  |  |
| RF00024 | 451 | 346    | 0/50     | –        | 0/50     | –       | 0/50     | –      |  |
| RF00025 | 210 | 173    | 41/50    | 212.65   | 16/50    | 57.4    | 20/50    | 168.73 |  |
| RF00026 | 102 | 97     | 50/50    | 1.38     | 46/50    | 2.94    | 25/50    | 38.41  |  |
| RF00027 | 79  | 48     | 50/50    | 0.81     | 50/50    | 0.88    | 41/50    | 36.7   |  |
| RF00028 | 344 | 291    | 1/50     | 141.66   | 0/50     | –       | 0/50     | –      |  |
| RF00029 | 73  | 54     | 50/50    | 73.09    | 1/50     | 1.56    | 26/50    | 37.56  |  |
| RF00030 | 340 | 276    | 7/50     | 248.83   | 16/50    | 357.5   | 0/50     | –      |  |
| Total   |     |        | 826/1450 |          | 659/1450 |         | 417/1450 |        |  |

Table S10: GC-content 0.4

| Data    |     |        | MCTS-RNA |        | antaRNA  |        | MODENA   |        |
|---------|-----|--------|----------|--------|----------|--------|----------|--------|
| Rfam    | len | $\ell$ | $Sc$     | $E_t$  | $Sc$     | $E_t$  | $Sc$     | $E_t$  |
| RF00001 | 117 | 83     | 7/50     | 123.27 | 2/50     | 15.53  | 0/50     | –      |
| RF00002 | 151 | 127    | 50/50    | 14.19  | 1/50     | 344.15 | 0/50     | –      |
| RF00003 | 16  | 121    | 0/50     | –      | 0/50     | –      | 0/50     | –      |
| RF00004 | 193 | 149    | 50/50    | 12.43  | 50/50    | 13.84  | 50/50    | 113.15 |
| RF00005 | 74  | 53     | 50/50    | 0.4    | 50/50    | 0.67   | 49/50    | 32.64  |
| RF00006 | 89  | 69     | 50/50    | 1.27   | 50/50    | 2.52   | 18/50    | 37.31  |
| RF00007 | 154 | 112    | 50/50    | 15.27  | 13/50    | 7.69   | 29/50    | 80.85  |
| RF00008 | 54  | 39     | 50/50    | 0.16   | 50/50    | 0.32   | 45/50    | 28.2   |
| RF00009 | 348 | 293    | 49/50    | 168.69 | 1/50     | 309.9  |          |        |
| RF00010 | 357 | 255    | 0/50     | –      | 0/50     | –      |          |        |
| RF00011 | 382 | 382    | 0/50     | –      | 0/50     | –      |          |        |
| RF00012 | 215 | 176    | 50/50    | 45.02  | 50/50    | 12.09  | 50/50    | 201.62 |
| RF00013 | 185 | 137    | 50/50    | 72.95  | 47/50    | 9.87   | 26/50    | 118.67 |
| RF00014 | 87  | 58     | 50/50    | 0.19   | 45/50    | 0.63   | 50/50    | 39.31  |
| RF00015 | 140 | 109    | 50/50    | 12.31  | 23/50    | 9.86   | 22/50    | 66.04  |
| RF00016 | 129 | 129    | 0/50     | –      | 0/50     | –      | 0/50     | –      |
| RF00017 | 301 | 200    | 29/50    | 237.53 | 42/50    | 58.11  | 32/50    | 479.22 |
| RF00018 | 360 | 311    | 0/50     | –      | 0/50     | –      | 0/50     | –      |
| RF00019 | 83  | 60     | 50/50    | 2.57   | 44/50    | 1.61   | 40/50    | 34.47  |
| RF00020 | 119 | 89     | 0/50     | –      | 0/50     | –      |          |        |
| RF00021 | 118 | 81     | 50/50    | 0.38   | 50/50    | 1.01   | 50/50    | 55.05  |
| RF00022 | 148 | 115    | 50/50    | 7.19   | 44/50    | 10.07  | 42/50    | 72.28  |
| RF00024 | 451 | 346    | 0/50     | –      | 0/50     | –      | 0/50     | –      |
| RF00025 | 210 | 173    | 50/50    | 43.2   | 21/50    | 83.1   | 45/50    | 164.96 |
| RF00026 | 102 | 97     | 50/50    | 0.86   | 50/50    | 2.98   | 50/50    | 38.38  |
| RF00027 | 79  | 48     | 50/50    | 0.36   | 50/50    | 0.67   | 50/50    | 36.95  |
| RF00028 | 344 | 291    | 14/50    | 285.11 | 0/50     | –      | 0/50     | –      |
| RF00029 | 73  | 54     | 50/50    | 48.83  | 5/50     | 1.1    | 45/50    | 36.11  |
| RF00030 | 340 | 276    | 32/50    | 226.45 | 37/50    | 302.78 | 45/50    | 388.17 |
| Total   |     |        | 982/1450 |        | 725/1450 |        | 738/1450 |        |

Table S11: GC content 0.5

| Data    |     |        | MCTS-RNA  |        | antaRNA  |        | MODENA   |        |
|---------|-----|--------|-----------|--------|----------|--------|----------|--------|
| Rfam    | $N$ | $\ell$ | $Sc$      | $E_t$  | $Sc$     | $E_t$  | $Sc$     | $E_t$  |
| RF00001 | 117 | 83     | 44/50     | 196.87 | 4/50     | 28.87  | 0/50     | –      |
| RF00002 | 151 | 127    | 41/50     | 166.06 | 0/50     | –      | 13/50    | 64.62  |
| RF00003 | 161 | 121    | 5/50      | 371.86 | 0/50     | –      | 50/50    | 84.43  |
| RF00004 | 193 | 149    | 50/50     | 3.4    | 50/50    | 20.04  | 50/50    | 130.99 |
| RF00005 | 74  | 53     | 50/50     | 0.15   | 50/50    | 0.64   | 50/50    | 32.25  |
| RF00006 | 89  | 69     | 50/50     | 0.38   | 50/50    | 3.65   | 50/50    | 37.49  |
| RF00007 | 154 | 112    | 50/50     | 10.08  | 19/50    | 8.19   | 49/50    | 76.19  |
| RF00008 | 54  | 39     | 50/50     | 0.49   | 50/50    | 0.33   | 50/50    | 28.32  |
| RF00009 | 348 | 293    | 48/50     | 84.58  | 0/50     | –      | 0/50     | –      |
| RF00010 | 357 | 255    | 0/50      | –      | 0/50     | –      | 0/50     | –      |
| RF00011 | 382 | 286    | 0/50      | –      | 0/50     | –      | 0/50     | –      |
| RF00012 | 215 | 176    | 50/50     | 5.64   | 50/50    | 30.6   | 50/50    | 197.66 |
| RF00013 | 185 | 137    | 50/50     | 31.05  | 46/50    | 12.83  | 50/50    | 124.12 |
| RF00014 | 87  | 58     | 50/50     | 0.1    | 44/50    | 0.78   | 42/50    | 40.6   |
| RF00015 | 140 | 109    | 50/50     | 2.07   | 22/50    | 10.59  | 49/50    | 62.18  |
| RF00016 | 129 | 112    | 0/50      | –      | 0/50     | –      | 0/50     | –      |
| RF00017 | 301 | 200    | 49/50     | 133.19 | 44/50    | 56.24  | 50/50    | 452.17 |
| RF00018 | 360 | 311    | 0/50      | –      | 0/50     | –      | 0/50     | –      |
| RF00019 | 83  | 60     | 50/50     | 1.51   | 49/50    | 1.67   | 50/50    | 36.32  |
| RF00020 | 119 | 89     | 0/50      | –      | 0/50     | –      | 0/50     | –      |
| RF00021 | 118 | 81     | 50/50     | 0.26   | 50/50    | 0.98   | 50/50    | 55.34  |
| RF00022 | 148 | 115    | 50/50     | 1.34   | 49/50    | 10.04  | 50/50    | 74.6   |
| RF00024 | 451 | 346    | 0/50      | –      | 0/50     | –      | 0/50     | –      |
| RF00025 | 210 | 173    | 50/50     | 4.88   | 22/50    | 71.32  | 50/50    | 170.58 |
| RF00026 | 102 | 97     | 50/50     | 1.6    | 50/50    | 3.37   | 50/50    | 84.66  |
| RF00027 | 79  | 48     | 50/50     | 0.19   | 50/50    | 0.76   | 50/50    | 37.35  |
| RF00028 | 344 | 291    | 7/50      | 336.39 | 0/50     | –      | 0/50     | –      |
| RF00029 | 73  | 54     | 50/50     | 2.16   | 14/50    | 7.49   | 50/50    | 35.46  |
| RF00030 | 340 | 276    | 50/50     | 19.96  | 31/50    | 298.74 | 50/50    | 414.19 |
| total   |     |        | 1045/1450 |        | 744/1450 |        | 953/1450 |        |

Table S12: GC-content 0.6

| Data    |     |        |          | MCTS-RNA |          | antaRNA |          | MODENA |  |
|---------|-----|--------|----------|----------|----------|---------|----------|--------|--|
| Rfam    | len | $\ell$ | $Sc$     | $E_t$    | $Sc$     | $E_t$   | $Sc$     | $E_t$  |  |
| RF00001 | 117 | 83     | 50/50    | 19.56    | 8/50     | 19.96   | 49/50    | 51.82  |  |
| RF00002 | 151 | 127    | 0/50     | –        | 0/50     | –       | 4/50     | 67.31  |  |
| RF00003 | 16  | 121    | 26/50    | 213.4    | 0/50     | –       | 0/50     | –      |  |
| RF00004 | 193 | 149    | 50/50    | 2.31     | 50/50    | 19.05   | 50/50    | 127.04 |  |
| RF00005 | 74  | 53     | 50/50    | 0.08     | 50/50    | 0.62    | 50/50    | 33.79  |  |
| RF00006 | 89  | 69     | 50/50    | 0.47     | 50/50    | 3.51    | 46/50    | 36.06  |  |
| RF00007 | 154 | 112    | 50/50    | 4.11     | 13/50    | 9.08    | 50/50    | 82.69  |  |
| RF00008 | 54  | 39     | 50/50    | 0.27     | 50/50    | 0.36    | 50/50    | 28.59  |  |
| RF00009 | 348 | 293    | 4/50     | 232.75   | 0/50     | –       | 0/50     | –      |  |
| RF00010 | 357 | 255    | 0/50     | –        | 0/50     | –       | 0/50     | –      |  |
| RF00011 | 382 | 382    | 0/50     | –        | 0/50     | –       | –        | –      |  |
| RF00012 | 215 | 176    | 50/50    | 26.39    | 50/50    | 29.37   | 50/50    | 185.48 |  |
| RF00013 | 185 | 137    | 50/50    | 3.56     | 50/50    | 10.69   | 50/50    | 125.43 |  |
| RF00014 | 87  | 58     | 50/50    | 0.13     | 48/50    | 0.6     | 50/50    | 39.75  |  |
| RF00015 | 140 | 109    | 50/50    | 2.77     | 34/50    | 12.2    | 50/50    | 62.58  |  |
| RF00016 | 129 | 129    | 0/50     | –        | 0/50     | –       | 0/50     | –      |  |
| RF00017 | 301 | 200    | 48/50    | 70.17    | 46/50    | 50.13   | 50/50    | 467.26 |  |
| RF00018 | 360 | 311    | 0/50     | –        | 0/50     | –       | 0/50     | –      |  |
| RF00019 | 83  | 60     | 50/50    | 0.39     | 49/50    | 1.5     | 50/50    | 36.35  |  |
| RF00020 | 119 | 89     | 0/50     | –        | 0/50     | –       | 0/50     | –      |  |
| RF00021 | 118 | 81     | 50/50    | 0.5      | 50/50    | 1.37    | 49/50    | 55.37  |  |
| RF00022 | 148 | 115    | 50/50    | 1.86     | 49/50    | 12.46   | 50/50    | 72.01  |  |
| RF00024 | 451 | 346    | 0/50     | –        | 0/50     | –       | 0/50     | –      |  |
| RF00025 | 210 | 173    | 50/50    | 50.25    | 26/50    | 78.35   | 21/50    | 163.39 |  |
| RF00026 | 102 | 97     | 50/50    | 4.51     | 49/50    | 4.37    | 38/50    | 36.69  |  |
| RF00027 | 79  | 48     | 50/50    | 0.19     | 50/50    | 0.65    | 50/50    | 36.71  |  |
| RF00028 | 344 | 291    | 1/50     | 477.45   | 1/50     | 280.54  | 0/50     | –      |  |
| RF00029 | 73  | 54     | 50/50    | 1.23     | 17/50    | 2.22    | 50/50    | 33.37  |  |
| RF00030 | 340 | 276    | 37/50    | 147.8    | 32/50    | 270.87  | 5/50     | 428.34 |  |
| Total   |     |        | 965/1450 |          | 772/1450 |         | 862/1450 |        |  |

Table S13: GC-content 0.7

| Data    |     |        | MCTS-RNA |        | antaRNA  |        | MODENA   |        |
|---------|-----|--------|----------|--------|----------|--------|----------|--------|
| Rfam    | len | $\ell$ | $Sc$     | $E_t$  | $Sc$     | $E_t$  | $Sc$     | $E_t$  |
| RF00001 | 117 | 83     | 50/50    | 57.59  | 6/50     | 26.28  | 0/50     | –      |
| RF00002 | 151 | 127    | 0/50     | –      | 0/50     | –      | 0/50     | –      |
| RF00003 | 16  | 121    | 2/50     | 88.78  | 0/50     | –      | 0/50     | –      |
| RF00004 | 193 | 149    | 50/50    | 33.89  | 50/50    | 27.8   | 50/50    | 125.92 |
| RF00005 | 74  | 53     | 50/50    | 0.18   | 50/50    | 0.97   | 50/50    | 32.89  |
| RF00006 | 89  | 69     | 50/50    | 11.53  | 50/50    | 4.62   | 50/50    | 38.07  |
| RF00007 | 154 | 112    | 50/50    | 7.86   | 11/50    | 65.33  | 49/50    | 78.06  |
| RF00008 | 54  | 39     | 50/50    | 0.1    | 50/50    | 0.43   | 50/50    | 17.96  |
| RF00009 | 348 | 293    | 0/50     | –      | 0/50     | –      | 0/50     | –      |
| RF00010 | 357 | 255    | 0/50     | –      | 0/50     | –      | 0/50     | –      |
| RF00011 | 382 | 382    | 0/50     | –      | 0/50     | –      | 0/50     | –      |
| RF00012 | 215 | 176    | 35/50    | 284.5  | 50/50    | 41.39  | 12/50    | 205.35 |
| RF00013 | 185 | 137    | 50/50    | 3.13   | 48/50    | 16.14  | 49/50    | 129.32 |
| RF00014 | 87  | 58     | 50/50    | 0.11   | 48/50    | 0.77   | 49/50    | 39.53  |
| RF00015 | 140 | 109    | 45/50    | 143.12 | 32/50    | 22.67  | 48/50    | 62.54  |
| RF00016 | 129 | 129    | 0/50     | –      | 0/50     | –      | 0/50     | –      |
| RF00017 | 301 | 200    | 50/50    | 17     | 50/50    | 58.63  | 34/50    | 486.18 |
| RF00018 | 360 | 311    | 0/50     | –      | 0/50     | –      | 0/50     | –      |
| RF00019 | 83  | 60     | 50/50    | 0.41   | 49/50    | 1.92   | 50/50    | 35.26  |
| RF00020 | 119 | 89     | 0/50     | –      | 0/50     | –      | 0/50     | –      |
| RF00021 | 118 | 81     | 50/50    | 0.17   | 50/50    | 2.19   | 50/50    | 55.97  |
| RF00022 | 148 | 115    | 50/50    | 47.97  | 49/50    | 18.4   | 34/50    | 75.66  |
| RF00024 | 451 | 346    | 0/50     | –      | 0/50     | –      | 0/50     | –      |
| RF00025 | 210 | 173    | 3/50     | 241.36 | 29/50    | 190.48 | 0/50     | –      |
| RF00026 | 102 | 97     | 50/50    | 24.74  | 46/50    | 7.8    | 12/50    | 38.77  |
| RF00027 | 79  | 48     | 50/50    | 0.25   | 50/50    | 0.81   | 50/50    | 35.52  |
| RF00028 | 344 | 291    | 0/50     | –      | 0/50     | –      | 0/50     | –      |
| RF00029 | 73  | 54     | 50/50    | 2.67   | 28/50    | 2.38   | 50/50    | 33.62  |
| RF00030 | 340 | 276    | 0/50     | –      | 0/50     | –      | 0/50     | –      |
| Total   |     |        | 835/1450 |        | 749/1450 |        | 687/1450 |        |

Table S14: GC-content 0.8

| Data    |     |        | MCTS-RNA |        | antaRNA  |        | MODENA   |        |
|---------|-----|--------|----------|--------|----------|--------|----------|--------|
| Rfam    | len | $\ell$ | $Sc$     | $E_t$  | $Sc$     | $E_t$  | $Sc$     | $E_t$  |
| RF00001 | 117 | 83     | 0/50     | –      | 6/50     | 188.5  | 0/50     | –      |
| RF00002 | 151 | 127    | 0/50     | –      | 0/50     | –      | 0/50     | –      |
| RF00003 | 16  | 121    | 0/50     | –      | 0/50     | –      | 0/50     | –      |
| RF00004 | 193 | 149    | 18/50    | 265.02 | 47/50    | 193.23 | 17/50    | 147.89 |
| RF00005 | 74  | 53     | 50/50    | 1.47   | 50/50    | 1.76   | 25/50    | 33.73  |
| RF00006 | 89  | 69     | 34/50    | 254.58 | 50/50    | 9.65   | 23/50    | 38.31  |
| RF00007 | 154 | 112    | 23/50    | 205.08 | 22/50    | 38.9   | 17/50    | 81.92  |
| RF00008 | 54  | 39     | 50/50    | 0.24   | 50/50    | 0.62   | 50/50    | 28.81  |
| RF00009 | 348 | 293    | 0/50     | –      | 0/50     | –      | 0/50     | –      |
| RF00010 | 357 | 255    | 0/50     | –      | 0/50     | –      | 0/50     | –      |
| RF00011 | 382 | 382    | 0/50     | –      | 0/50     | –      | 0/50     | –      |
| RF00012 | 215 | 176    | 2/50     | 121.2  | 16/50    | 287.75 | 0/50     | –      |
| RF00013 | 185 | 137    | 44/50    | 174.58 | 49/50    | 26.19  | 0/50     | –      |
| RF00014 | 87  | 58     | 50/50    | 0.11   | 50/50    | 1.01   | 50/50    | 40.62  |
| RF00015 | 140 | 109    | 2/50     | 121.89 | 0/50     | –      | 0/50     | –      |
| RF00016 | 129 | 129    | 0/50     | –      | 0/50     | –      | 0/50     | –      |
| RF00017 | 301 | 200    | 50/50    | 31.49  | 49/50    | 128.82 | 0/50     | –      |
| RF00018 | 360 | 311    | 0/50     | –      | 0/50     | –      | 0/50     | –      |
| RF00019 | 83  | 60     | 50/50    | 3.54   | 49/50    | 3.43   | 36/50    | 38.42  |
| RF00020 | 119 | 89     | 0/50     | –      | 0/50     | –      | 0/50     | –      |
| RF00021 | 118 | 81     | 50/50    | 0.97   | 50/50    | 3.42   | 50/50    | 57.13  |
| RF00022 | 148 | 115    | 28/50    | 283.21 | 50/50    | 108.44 | 7/50     | 76.22  |
| RF00024 | 451 | 346    | 0/50     | –      | 0/50     | –      | 0/50     | –      |
| RF00025 | 210 | 173    | 3/50     | 20.33  | 4/50     | 212.79 | 0/50     | –      |
| RF00026 | 102 | 97     | 50/50    | 149.79 | 47/50    | 44.91  | 0/50     | –      |
| RF00027 | 79  | 48     | 50/50    | 0.23   | 50/50    | 1.11   | 50/50    | 36.87  |
| RF00028 | 344 | 291    | 0/50     | –      | 0/50     | –      | 0/50     | –      |
| RF00029 | 73  | 54     | 49/50    | 99.3   | 33/50    | 1.48   | 9/50     | 35.34  |
| RF00030 | 340 | 276    | 0/50     | –      | 0/50     | –      | 0/50     | –      |
| Total   |     |        | 603/1450 |        | 668/1450 |        | 376/1450 |        |

## 2.2 Results of MCTS-RNA and antaRNA with optimized parameters

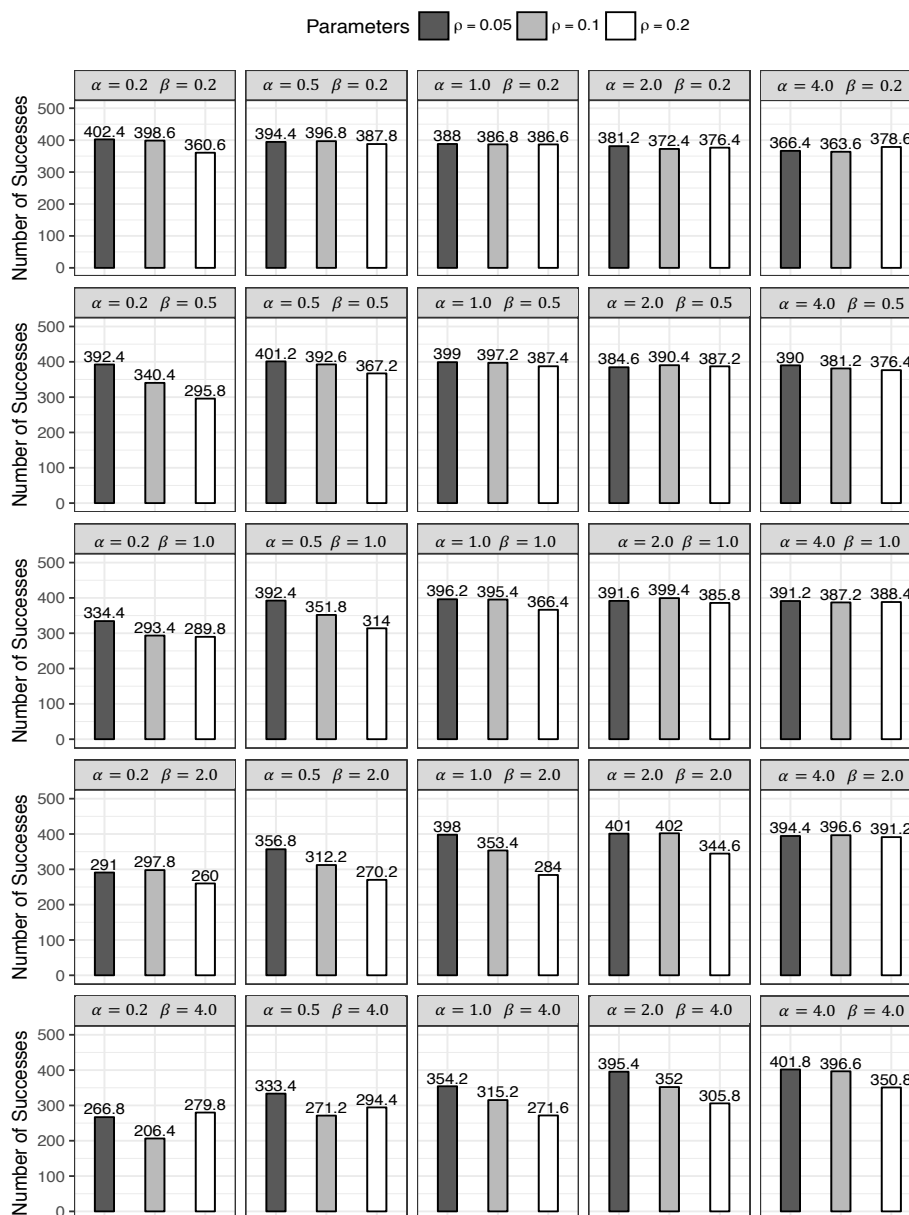

Figure S1: Performance of antaRNA at different parameter settings.  $\alpha$  is the probability weight for terrain pheromone influence.  $\beta$  is the probability weight for terrain path influence.  $\rho$  is the pheromone evaporation rate (?). The average number of successes is counted for five datasets.

Each dataset consists of randomly selected 4 nested and 4 pseudoknot structures.

$\alpha = 0.2, \beta = 0.2, \rho = 0.05$  is the best setting and used for all the following experiments.



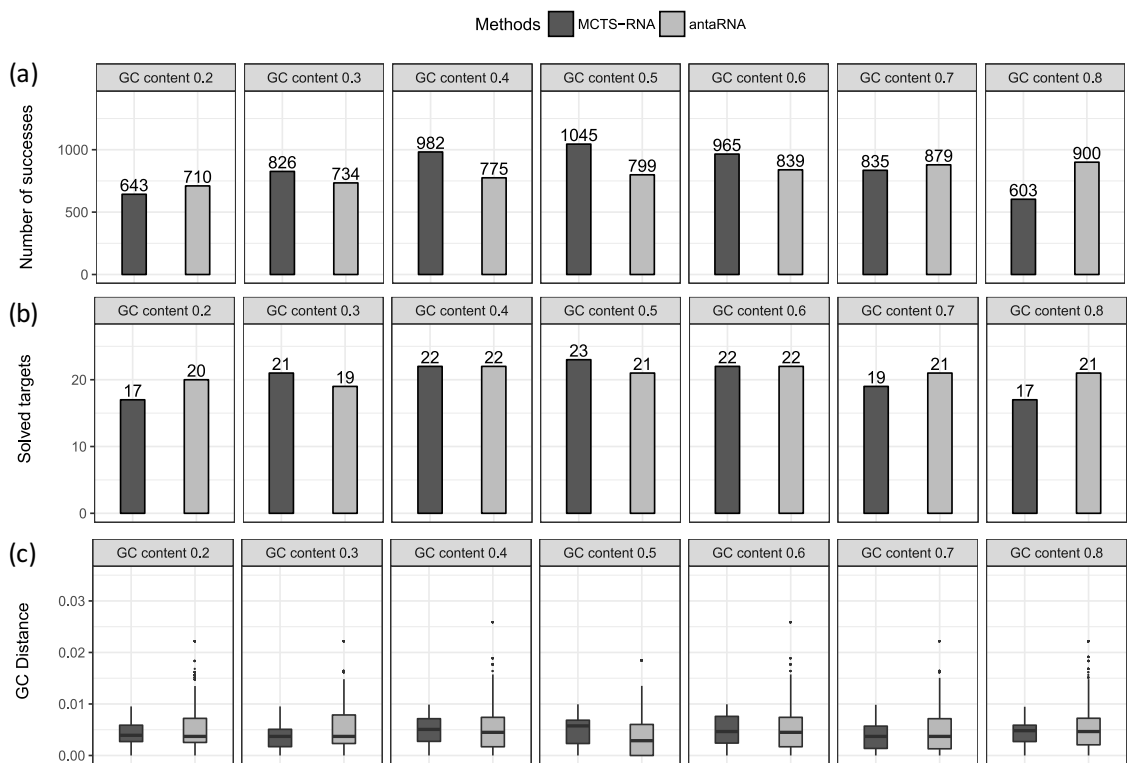

Figure S2: Experimental results of MCTS-RNA and antaRNA with optimized parameters ( $\alpha = 0.2, \beta = 0.2, \rho = 0.05$ ) at different target values of GC content for nested structures. (a) Total number of successful designs in 29 target structures. (b) Number of solved target structures. (c) Distribution of GC distance (i.e., the difference of obtained and target GC content).

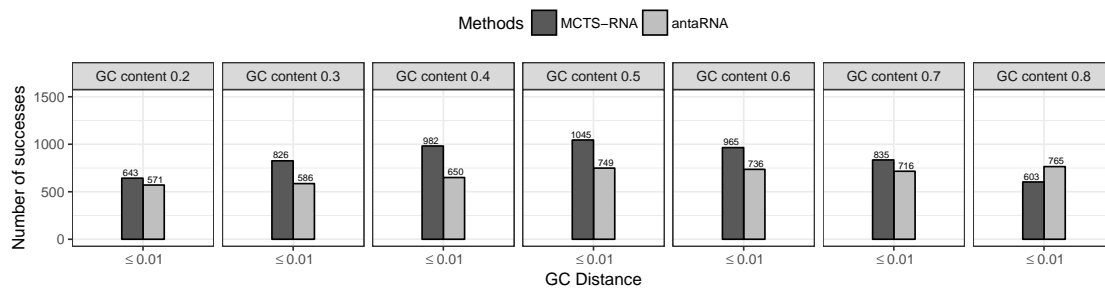

Figure S3: Total number of successfully designed sequences whose GC distance is within a certain threshold. As in Figure S2, MCTS-RNA and antaRNA with optimized parameters ( $\alpha = 0.2, \beta = 0.2, \rho = 0.05$ ) were applied to 29 nested structures.

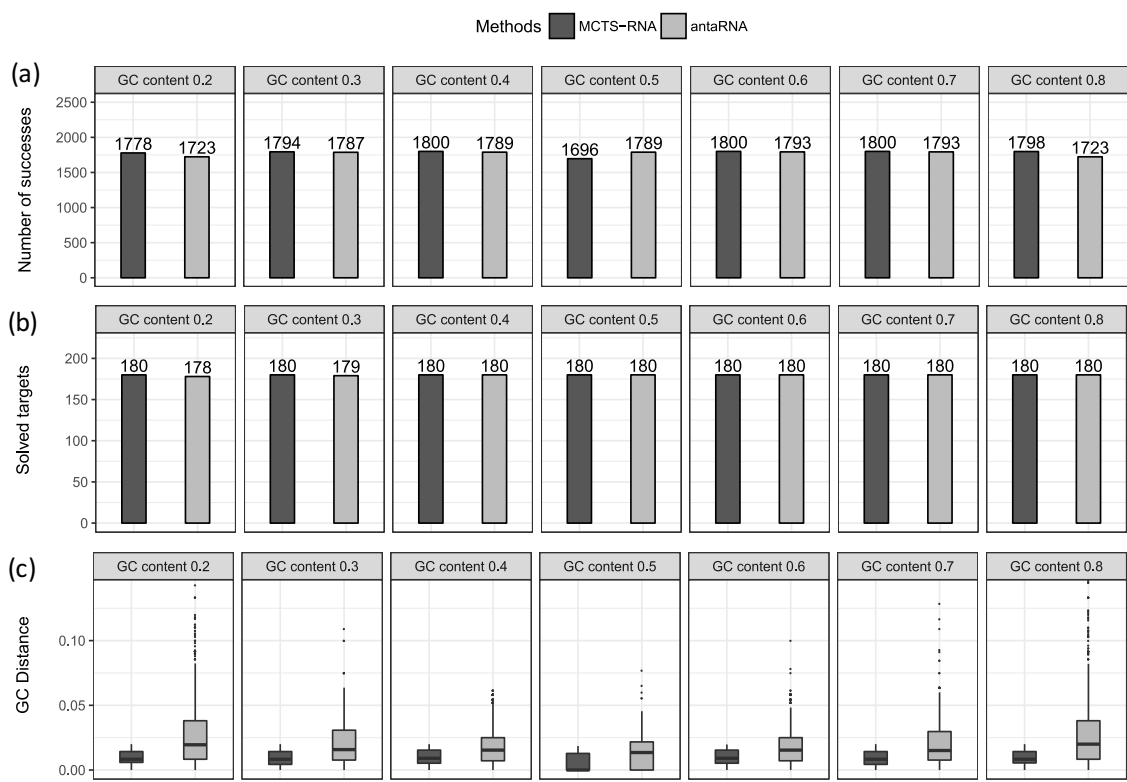

Figure S4: Experimental results of MCTS-RNA and antaRNA with optimized parameters ( $\alpha = 0.2, \beta = 0.2, \rho = 0.05$ ) at different target values of GC content for pseudoknot structures. (a) Total number of successfully designed sequences in 249 target structures. (b) Number of solved target structures. (c) Distribution of the error of GC content.

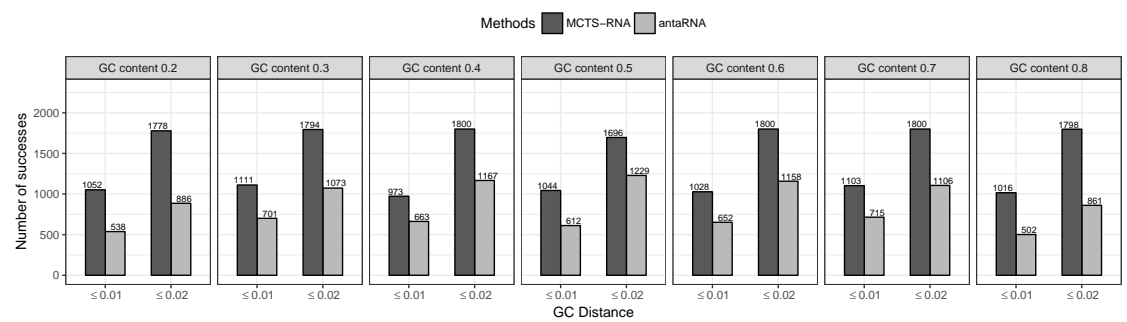

Figure S5: Total number of successfully designed sequences whose GC distance is within a certain threshold. As in Figure S3, MCTS-RNA and antaRNA with optimized parameters ( $\alpha = 0.2, \beta = 0.2, \rho = 0.05$ ) were applied to 249 pseudoknot structures.

## 2.3 Results without the structures used in parameter optimization

The randomly selected five datasets (each contains randomly selected 4 nested and 4 pseudoknot structures) used for parameter optimization are shown in Table S15. After removing them, there remain 16 Rfam structures and 229 pseudobase++ structures. The experimental results using the remaining structures are shown in Figure S6-Figure S9

Table S15: Randomly selected structures for parameter optimization.

| Data     | Nested                             | Pseudoknot                     |
|----------|------------------------------------|--------------------------------|
| Dataset1 | RF00022, RF00009, RF00015, RF00010 | PKB14, PKB233, PKB66, PKB70    |
| Dataset2 | RF00009, RF00019, RF00014, RF00022 | PKB294, PKB298, PKB297, PKB220 |
| Dataset3 | RF00016, RF00025, RF00019, RF00029 | PKB15, PKB302, PKB103, PKB286  |
| Dataset4 | RF00005, RF00014, RF00017, RF00019 | PKB31, PKB8, PKB14, PKB40      |
| Dataset5 | RF00006, RF00008, RF00019, RF00005 | PKB30, PKB74, PKB39, PKB41     |

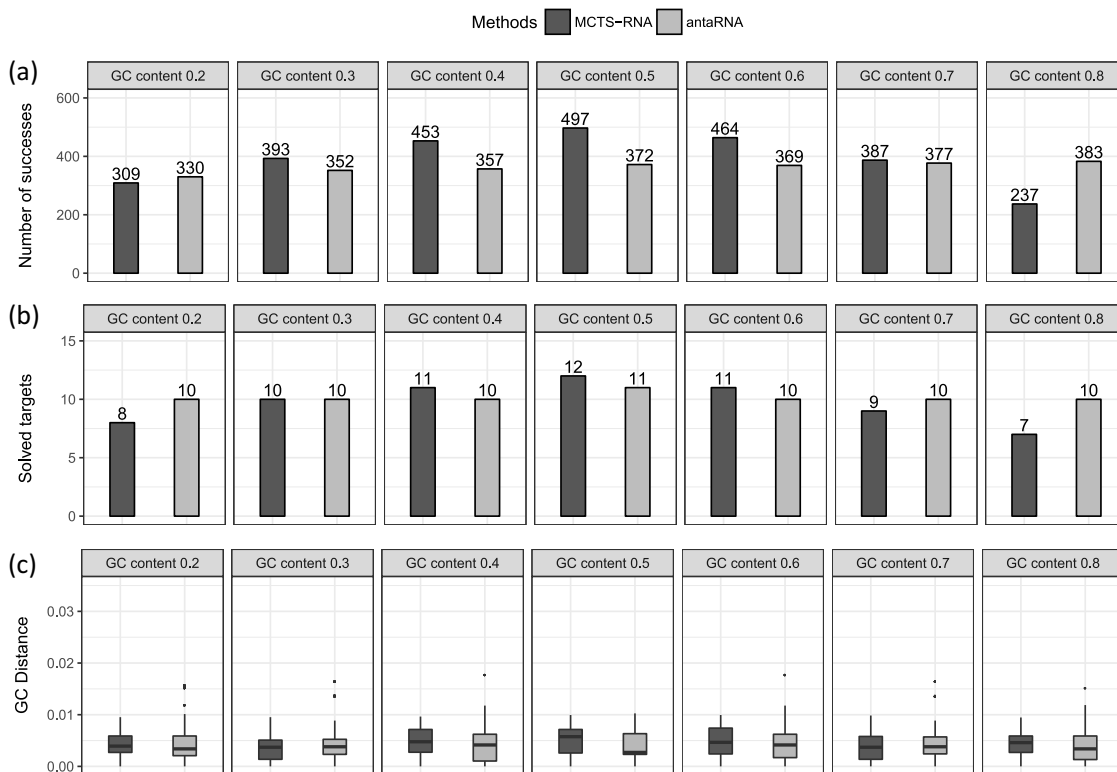

Figure S6: Experimental results of MCTS-RNA and antaRNA with optimized parameters ( $\alpha = 0.2, \beta = 0.2, \rho = 0.05$ ) at different target values of GC content for 16 test nested structures. (a) Total number of successfully designed sequences in 16 target structures. (b) Number of solved target structures. (c) Distribution of the error of GC content.

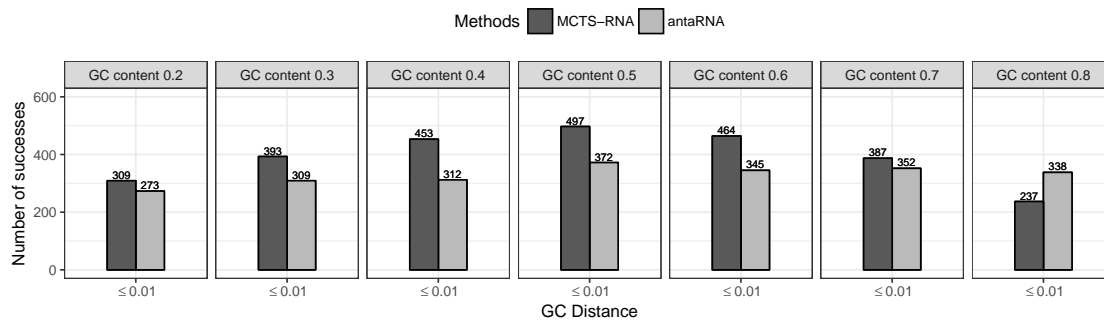

Figure S7: Total number of successfully designed sequences whose GC distance is within a certain threshold. As in Figure S6, MCTS-RNA and antaRNA with optimized parameters ( $\alpha = 0.2, \beta = 0.2, \rho = 0.05$ ) were applied to 16 test nested structures.

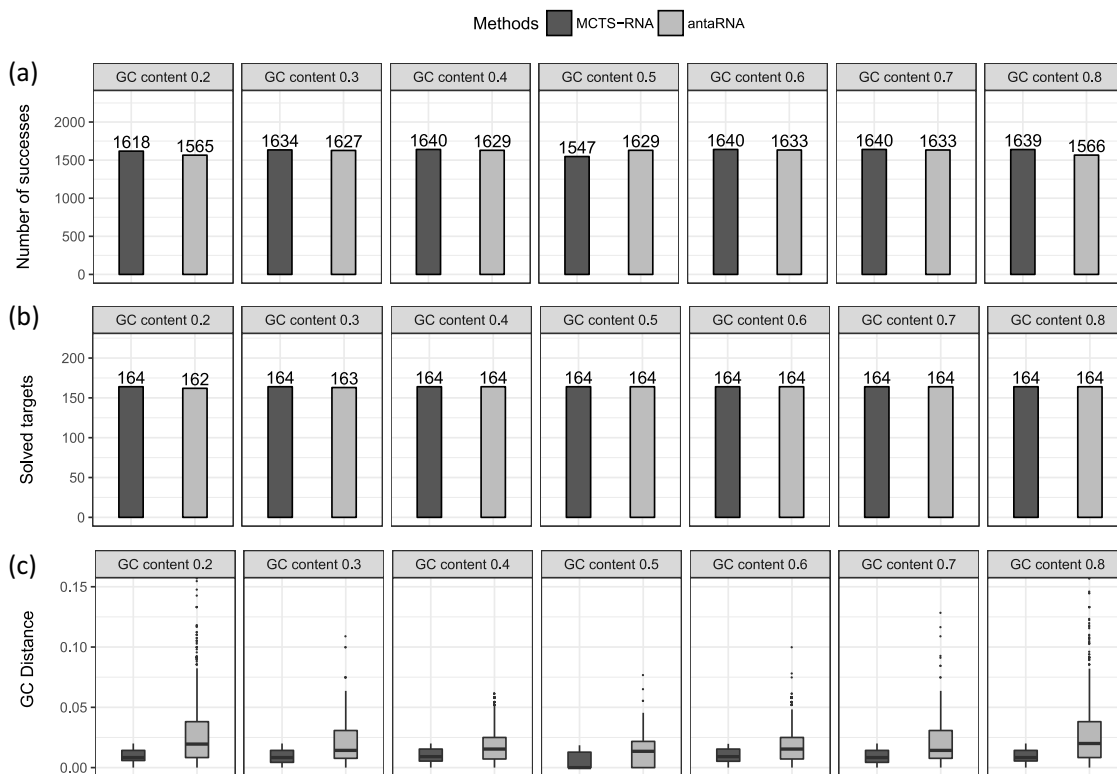

Figure S8: Experimental results of MCTS-RNA and antaRNA with optimized parameters ( $\alpha = 0.2, \beta = 0.2, \rho = 0.05$ ) at different target values of GC content for 229 test pseudoknot structures. (a) Total number of successfully designed sequences in 229 test target structures. (b) Number of solved target structures. (c) Distribution of the error of GC content.

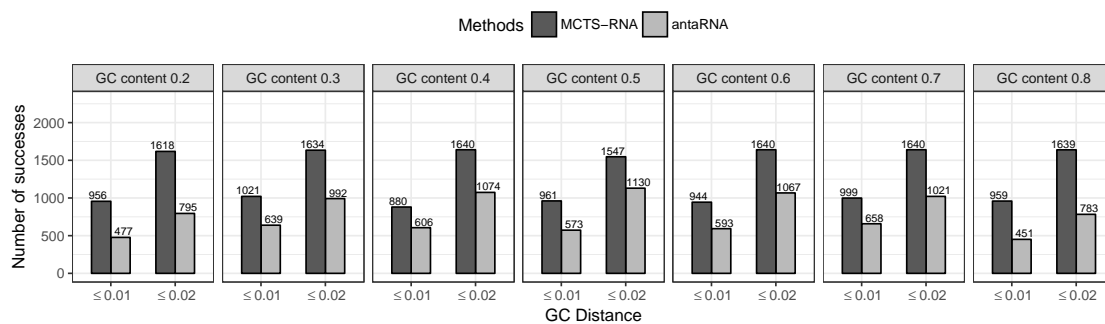

Figure S9: Total number of successfully designed sequences whose GC distance is within a certain threshold. As in Figure S8, MCTS-RNA and antaRNA with optimized parameters ( $\alpha = 0.2, \beta = 0.2, \rho = 0.05$ ) were applied to 229 test pseudoknot structures.
